# Supplementary material for: Identification and Characterization of the BBX Gene Family in Bambusa pervariabilis × Dendrocalamopsis grandis and Their Potential Role under Adverse Environmental Stresses
Source: MDPI journal article supplement (doi:10.3390/ijms241713465), 2023-08-30
Supplement: s1 [file s1]

## Supplementary Materials

**Table S1.** qPCR primers for 21 *BDBBX* genes.

| Primer Name | Primer Sequence 5'-3' |                      |
|-------------|-----------------------|----------------------|
| BDBBX1-F    | CGACATCTGCCAGGTGAGAG  |                      |
| BDBBX1-R    | AGGAACCCCCTCTTCTCCTG  |                      |
| BDBBX2-F    | CAGAACGCCCAGGACTTCTT  |                      |
| BDBBX2-R    | GGTTCTCCGGGGAGCATATG  |                      |
| BDBBX3-F    | TTGGGTTCAAGGAGCTGGAC  | GGTTCAAGGAGCTGGACTGG |
| BDBBX3-R    | ACCCGTGACTTCTTGCTCTG  | ACCGCTCGTCTTGTAGAAGC |
| BDBBX4-F    | TAACCACAAACGGCATTGGC  |                      |
| BDBBX4-R    | TGCTGTTCCCGTCAACAAGT  |                      |
| BDBBX5-F    | TCGTCACCTCCTGAAACACG  |                      |
| BDBBX5-R    | ACGCAGACTCGCTCGTGATC  |                      |
| BDBBX6-F    | AACGTGGATGCCAAGGACAT  |                      |
| BDBBX6-R    | CGTGTAGGAGCTGTAGGACG  |                      |
| BDBBX7-F    | TGCACTCCGCCAACAAGCT   | TTGCACGTGTGGGGTTCATA |
| BDBBX7-R    | GTACCTGGCAGATGTCGCAG  | GTCAGGGTAGTTTGGTGGCA |
| BDBBX8-F    | CTTTCCTGCGATGCCAAGGT  | GACAAGGCTCCGGAGTTTGA |
| BDBBX8-R    | CGGTCGACATGCAAGAACTG  | AGGAAAGGCAGAGGAACGC  |
| BDBBX9-F    | TCCGAGGAGGAGAACAGCAG  | GCAGCATCTCCGAGTACCTG |
| BDBBX9-R    | CATCGTCGACCAGGAAGTCC  | GTCTGCAGAGATGCCGGTAG |
| BDBBX10-F   | GCCAAAGTGCGACATATGCC  |                      |
| BDBBX10-R   | GGTCCTCGAGGCAGAAGAAG  |                      |
| BDBBX11-F   | AGGAGTCTCCTCTCGGGTTC  |                      |
| BDBBX11-R   | CTTGTAGAAACCCGCGTTGC  |                      |
| BDBBX12-F   | CAGAACGCCCAGGACTTCTT  |                      |
| BDBBX12-R   | GGTTCTCCGGGGAGCATATG  |                      |
| BDBBX13-F   | AGTTCCTCTGCTCCAAGTGC  |                      |
| BDBBX13-R   | CTTCTCGAACTCGGGGACAC  |                      |
| BDBBX14-F   | CTACGAGTCCAGCGACAAGG  |                      |
| BDBBX14-R   | CAGCTCCTTGAACCCGAGAG  |                      |
| BDBBX15-F   | ATAGAGGAGGCGGAGGAGGA  |                      |
| BDBBX15-R   | CGTCTTGGTCAGGTAAGTCCG |                      |
| BDBBX16-F   | AGCTATACAATCCCGTGCCC  | AGCTATACAATCCCGTGCCC |
| BDBBX16-R   | CTAGCAAGCTCCATGTCCGG  | CTAGCAAGCTCCATGTCCGG |
| BDBBX17-F   | CTCTTCTGCTCCGACCACTC  |                      |
| BDBBX17-R   | GCTTCTCTCGGTACCGCATC  |                      |
| BDBBX18-F   | CCTGGGGTTCTTGGACGAAG  |                      |
| BDBBX18-R   | ATCTCCGGCCGCTTCTTTTT  |                      |
| BDBBX19-F   | TGGAGCTGCACAAGTACTGG  |                      |
| BDBBX19-R   | CAGACCTCGCACATCCACAC  |                      |
| BDBBX20-F   | TCGTACCCACCACTTCTTGC  | TCGTACCCACCACTTCTTGC |

|           |                      |                      |
|-----------|----------------------|----------------------|
| BDBBX20-R | GTAGCGTGAAATCACCGTGC | GTAGCGTGAAATCACCGTGC |
| BDBBX21-F | CTCCACTTGGGTTCACGGAG |                      |
| BDBBX21-R | TCGTCTGTAGAAACCGGCG  |                      |

**Table S2.** Disease grading criteria.

| Degree  | Grading criteria                                         |
|---------|----------------------------------------------------------|
| 0 level | no disease observed on the leaf                          |
| 1 level | disease spots accounting for <30% of the total area      |
| 2 level | disease spots accounting for 30 to 50% of the total area |
| 3 level | disease spots accounting for >50% of the total area      |
| 4 level | withered leaves                                          |

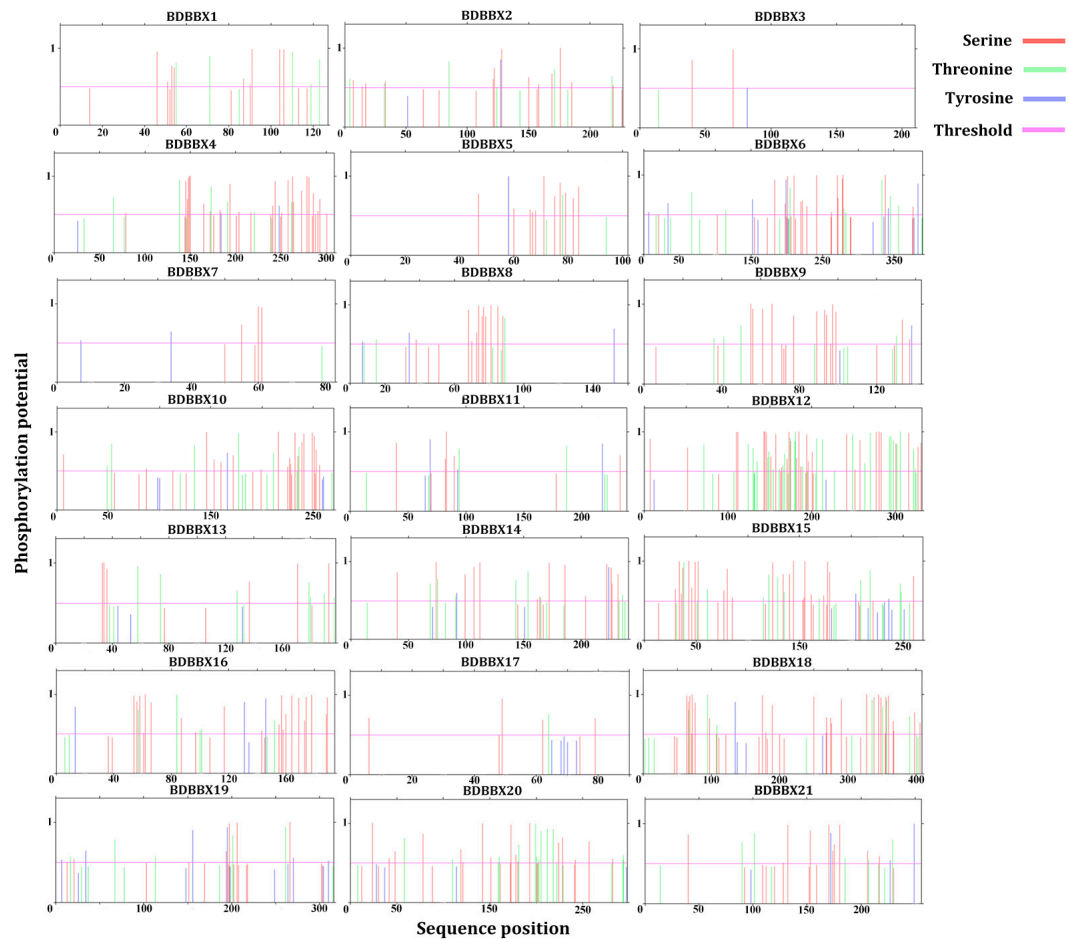

**Figure S1.** Potential phosphorylation sites for the *BDBBX* gene family.

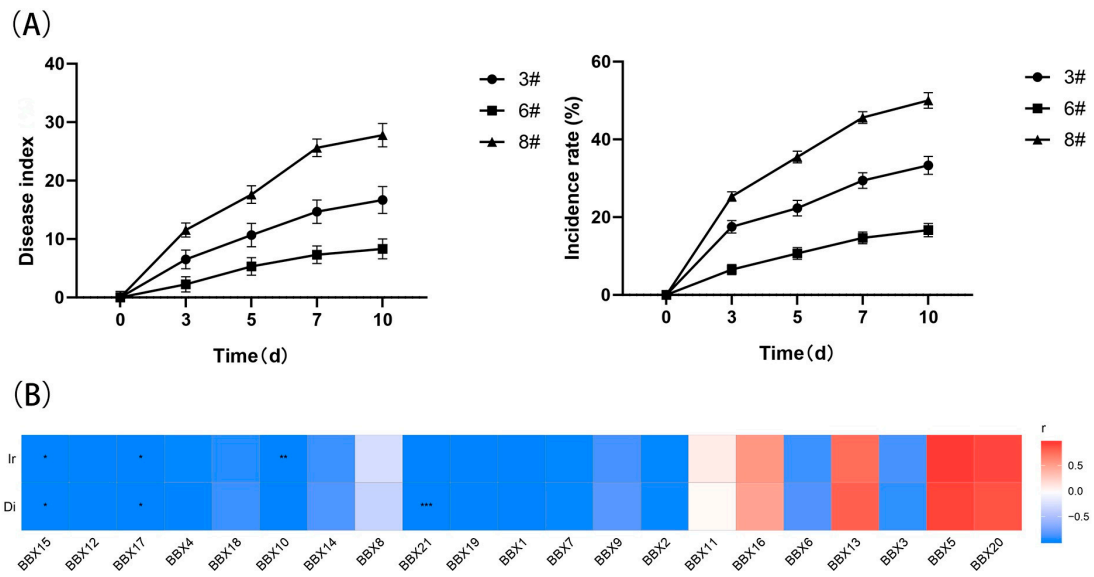

**Figure S2.** (A) Disease index of three *B. perversibilis*  $\times$  *D. grandis* varieties; (B) Correlation analysis of gene expression with incidence rate (Ir) and disease index (Di). \* indicates p value less than 0.05, \*\* indicates p value less than 0.01, and \*\*\* indicates p value less than 0.001.
